# Supplementary material for: Cdc7p-Dbf4p Regulates Mitotic Exit by Inhibiting Polo Kinase
Source: PLoS Genet. 2009 May 29;5(5):e1000498. doi: 10.1371/journal.pgen.1000498 (PMC2682205; doi:10.1371/journal.pgen.1000498)
Supplement: Table S2 — Plasmids used in this study. (0.05 MB DOC) [file pgen.1000498.s007.doc]

**Table S2. Plasmids used in this study**

| **Plasmid** | **Description** | **Source** |
| --- | --- | --- |
| pMHY193 | pRS316-GFP-Nop1 | M. Henry |
| pCG10 | pRS415-*DBF4110-704* | [26] |
| pCG53 | pGBKT7-*DBF467-704* | This study |
| pCG60 | pGBKT7-*DBF467-*227 , *ADH1* promoter D | “ |
| pCG61 | pCG60-*DBF4110-227* | “ |
| pCG74 | pGBKT7-*DBF4110-704* | “ |
| pCG162 | pRS416-*pGAL1, 10* | “ |
| pCG163 | pCG162*-**DBF4109-225* | “ |
| pCG166 | pCG162*-DBF41-225* | “ |
| pCG167 | pCG162*-DBF465-225* | “ |
| pCG213 | *pGAL-DBF41-225,  82-88* | “ |
| pCM3 | pGAD-*CDC5454-705* | “ |
| pCM4 | pGAD-*CDC5510-705* | “ |
| pCM16 | pAcSG2-*3Myc-CDC565-705* | “ |
| pCM21 | pCG60-*DBF467-109* | “ |
| pCM24 | pCM21, S84A, S92A, T95A, T105A | “ |
| pGAD-CDC5.3 | pGAD-*CDC5422-705* | “ |
| pHS4 | pSUMO-*DBF466-109* | “ |
| pMW489 | pRS415-*DBF4* | [26] |
| pMW535 | pRS415-*CDC5* | “ |
| pMW537 | pGEX-KG-*CDC5357-705* | “ |
| pYJ38 | pCG60-*DBF467-227 82-88* | “ |
| pYJ150 | pRS425-*DBF4110-704* | “ |
| pYJ152 | pRS425-*DBF4**82-88* | “ |
| pYJ154 | pRS425-*DBF4* | “ |
| pYJ161 | pRS425-*DBF4C312-704* | “ |
| pYJ162 | pRS425-*DBF465 + C312-704* | “ |
| pYJ163 | pRS425-*DBF4109 + C312-704* | “ |
| pYJ164 | pRS425-*DBF482-88 + C312-704* | “ |
| pYJ204 | pGBKT7-*DBF4 1-704* | “ |
| pYJ206 | pGBKT7-*DBF4 1-704, 82-88* | “ |
